# Supplementary material for: Repeatability of glucocorticoid hormones in vertebrates: a meta-analysis
Source: PeerJ. 2018 Feb 21;6:e4398. doi: 10.7717/peerj.4398 (PMC5826989; doi:10.7717/peerj.4398)
Supplement: Supplemental Information 2 [file peerj-06-4398-s002.xlsx]

## Sheet: GCr metaanalysis data
Study_ID	RepeatabilityEstimate	LowerConfidenceLimit	UpperConfidenceLimit	StandardError	Significance	p-value	N	SamplingInterval_days	NumberOfSamples	TaxonClass	Species	WithinAcrossLHS	LifeHistoryStage	Captive_Condition	Sex	Age	GC_Measure	Adjusted	AssayTracer	AssayType	BiologicalMaterial	Exp_Manipulation	StatisticalMethod	Notes	Reference	count
1	0.39				<0.05	0.011	13	8-14	>2	Aves	Parus major	Within	Non-breeding	Wild-caught Captive	Both	Adult	INITIAL	N	RIA	In-house	Plasma	N	ANOVA-ICC	R and p-values obtained from Cockrem et al. (2009) General and Comparative Endocrinology doi:10.1016/j.ygcen.2009.03.029	Cockrem, J. F., & Silverin, B. (2002). Variation within and between birds in corticosterone responses of great tits (Parus major)._General and comparative endocrinology,_125(2), 197-206.	2
1	0.678				<0.05	<0.001	13	8-14	>2	Aves	Parus major	Within	Non-breeding	Wild-caught Captive	Both	Adult	RESP	N	RIA	In-house	Plasma	N	ANOVA-ICC	R and p-values obtained from Cockrem et al. (2009) General and Comparative Endocrinology doi:10.1016/j.ygcen.2009.03.029	Cockrem, J. F., & Silverin, B. (2002). Variation within and between birds in corticosterone responses of great tits (Parus major)._General and comparative endocrinology,_125(2), 197-206.	2
2	0.08				>0.05	0.62	20	31-90	2	Aves	Passer domesticus	Across		Wild	Female	Adult	RESP	N	RIA	In-house	Plasma	N	ANOVA-ICC		Ouyang, J. Q., Sharp, P. J., Dawson, A., Quetting, M., & Hau, M. (2011). Hormone levels predict individual differences in reproductive success in a passerine bird. Proceedings of the Royal Society of London B: Biological Sciences, 278(1717), 2537-2545.	4
2	0.23				>0.05	0.16	20	31-90	2	Aves	Passer domesticus	Across		Wild	Male	Adult	RESP	N	RIA	In-house	Plasma	N	ANOVA-ICC		Ouyang, J. Q., Sharp, P. J., Dawson, A., Quetting, M., & Hau, M. (2011). Hormone levels predict individual differences in reproductive success in a passerine bird. Proceedings of the Royal Society of London B: Biological Sciences, 278(1717), 2537-2545.	4
2	0.04				>0.05	0.88	20	31-90	2	Aves	Passer domesticus	Across		Wild	Female	Adult	INITIAL	N	RIA	In-house	Plasma	N	ANOVA-ICC		Ouyang, J. Q., Sharp, P. J., Dawson, A., Quetting, M., & Hau, M. (2011). Hormone levels predict individual differences in reproductive success in a passerine bird. Proceedings of the Royal Society of London B: Biological Sciences, 278(1717), 2537-2545.	4
2	0.04				>0.05	0.89	20	31-90	2	Aves	Passer domesticus	Across		Wild	Male	Adult	INITIAL	N	RIA	In-house	Plasma	N	ANOVA-ICC		Ouyang, J. Q., Sharp, P. J., Dawson, A., Quetting, M., & Hau, M. (2011). Hormone levels predict individual differences in reproductive success in a passerine bird. Proceedings of the Royal Society of London B: Biological Sciences, 278(1717), 2537-2545.	4
3	-0.058				>0.05	0.647	18	0-7	>2	Aves	Pygoscelis adeliae	Within	Breeding	Wild	Both	Adult	INITIAL	N	RIA	In-house	Plasma	N	ANOVA-ICC		Cockrem, J. F., Barrett, D. P., Candy, E. J., & Potter, M. A. (2009). Corticosterone responses in birds: individual variation and repeatability in Adelie penguins (Pygoscelisadeliae) and other species, and the use of power analysis to determine sample sizes._General and comparative endocrinology,_163(1), 158-168.	2
3	0.545				<0.05	<0.001	18	0-7	>2	Aves	Pygoscelis adeliae	Within	Breeding	Wild	Both	Adult	RESP	N	RIA	In-house	Plasma	N	ANOVA-ICC		Cockrem, J. F., Barrett, D. P., Candy, E. J., & Potter, M. A. (2009). Corticosterone responses in birds: individual variation and repeatability in Adelie penguins (Pygoscelisadeliae) and other species, and the use of power analysis to determine sample sizes._General and comparative endocrinology,_163(1), 158-168.	2
4	0.4236				<0.05	<0.0001	32	31-90	2	Fish	Oncorhynchus mykiss	Within	Non-breeding	Captive	Both	Juvenile	RESP	N	RIA	In-house	Plasma	Y	Spearman	Assay tracer and sampling season information provided by personal communication with S Winberg	Schjolden, J., Stoskhus, A., & Winberg, S. (2005). Does individual variation in stress responses and agonistic behavior reflect divergent stress coping strategies in juvenile rainbow trout?._Physiological and Biochemical Zoology,_78(5), 715-723.	1
5	0.44				<0.05	0.016	26	365+	2	Fish	Micropterus salmoides	Within	Non-breeding	Wild	Both	Adult	RESP	N	RIA	Kit	Plasma	Y	Pearson	Individuals were caught from one lake and sampled (first measurement), then moved to a new lake, where after 6wks or 1yr, they were caught again and sampled (second measurement); Regression after controlling for significant effect of temperature because temperature differed between lakes; R-squared=0.19	Cook, K. V., OConnor, C. M., Gilmour, K. M., & Cooke, S. J. (2011). The glucocorticoid stress response is repeatable between years in a wild teleost fish._Journal of Comparative Physiology A,_197(12), 1189-1196.	2
5	0.062				>0.05	0.19	26	365+	2	Fish	Micropterus salmoides	Within	Non-breeding	Wild	Both	Adult	INITIAL	N	RIA	Kit	Plasma	Y	Pearson	Individuals were caught from one lake and sampled (first measurement), then moved to a new lake, where after 6wks or 1yr, they were caught again and sampled (second measurement); Regression after controlling for significant effect of temperature because temperature differed between lakes; R-squared=0.19	Cook, K. V., OConnor, C. M., Gilmour, K. M., & Cooke, S. J. (2011). The glucocorticoid stress response is repeatable between years in a wild teleost fish._Journal of Comparative Physiology A,_197(12), 1189-1196.	2
6	0.48				<0.05	0.006	10	31-90	>2	Aves	Anser anser	Within	Non-breeding	Wild	Male	Adult	INTEGRATED	N	EIA	In-house	Feces	Y	ANOVA-ICC	INT= measurement of fecal corticosterone metabolites following a low density feeding situation; FCM estimated as (change in) slope of regression line of FCM in successive droppings over time	Kralj-Fi_er, S., Scheiber, I. B., Blejec, A., Moestl, E., & Kotrschal, K. (2007). Individualities in a flock of free-roaming greylag geese: behavioral and physiological consistency over time and across situations. Hormones and Behavior, 51(2), 239-248.	1
7	0.13				>0.05	0.056	69	365+	>2	Aves	Aphelocoma coerulescens	Within	Pre-breeding	Wild	Both	Both	INITIAL	N	RIA	In-house	Plasma	N	ANOVA-ICC	Age= 11d-4y	Rensel, M. A., & Schoech, S. J. (2011). Repeatability of baseline and stress-induced corticosterone levels across early life stages in the Florida scrub-jay (Aphelocoma coerulescens). Hormones and Behavior, 59(4), 497-502.	2
7	0.5				<0.05	0.0001	37	365+	>2	Aves	Aphelocoma coerulescens	Within	Pre-breeding	Wild	Both	Both	RESP	Y	RIA	In-house	Plasma	N	ANOVA-ICC	RESP= 'relative corrected integrated GC response'; Adjusted for sampling time of day; Age= ~83d-3y	Rensel, M. A., & Schoech, S. J. (2011). Repeatability of baseline and stress-induced corticosterone levels across early life stages in the Florida scrub-jay (Aphelocoma coerulescens). Hormones and Behavior, 59(4), 497-502.	2
8	0.878						8	365+	2	Aves	Thalassarche melanophris	Within	Breeding	Wild	Both	Adult	INITIAL	N	RIA	In-house	Plasma	N	ANOVA-ICC		Angelier, F., Wingfield, J. C., Weimerskirch, H., & Chastel, O. (2010). Hormonal correlates of individual quality in a long-lived bird: a test of the äcorticosterone_fitness hypothesis. Biology Letters, 6(6), 846-849.	1
9	0.197				>0.05	0.12	58	8-14	>2	Aves	Parus major	Within	Non-breeding	Wild	Both	Adult	RESP	N	EIA	Kit	Plasma	N	MixedModel-ICC	Analyses included statistical outliers	Baugh, A. T., van Oers, K., Dingemanse, N. J., & Hau, M. (2014). Baseline and stress-induced glucocorticoid concentrations are not repeatable but covary within individual great tits (Parus major). General and comparative endocrinology, 208, 154-163.	2
9	0.264				>0.05	0.128	58	8-14	>2	Aves	Parus major	Within	Non-breeding	Wild	Both	Adult	INITIAL	N	EIA	Kit	Plasma	N	MixedModel-ICC	Analyses included statistical outliers	Baugh, A. T., van Oers, K., Dingemanse, N. J., & Hau, M. (2014). Baseline and stress-induced glucocorticoid concentrations are not repeatable but covary within individual great tits (Parus major). General and comparative endocrinology, 208, 154-163.	2
10	0	0	0		>0.05	0.297	19	31-90	2	Aves	Taeniopygia guttata			Captive	Female	Both	INITIAL	N	EIA	Kit	Plasma	N	ANOVA-ICC	Age= 16d-3mo; data provided by personal communication with H Wada	Wada, H., Salvante, K. G., Stables, C., Wagner, E., Williams, T. D., & Breuner, C. W. (2008). Adrenocortical responses in zebra finches (Taeniopygia guttata): individual variation, repeatability, and relationship to phenotypic quality. Hormones and Behavior, 53(3), 472-480.	4
10	0.413	0	0.739		<0.05	0.03	19	31-90	2	Aves	Taeniopygia guttata			Captive	Female	Both	RESP	N	EIA	Kit	Plasma	N	ANOVA-ICC	Age= 16d-3mo	Wada, H., Salvante, K. G., Stables, C., Wagner, E., Williams, T. D., & Breuner, C. W. (2008). Adrenocortical responses in zebra finches (Taeniopygia guttata): individual variation, repeatability, and relationship to phenotypic quality. Hormones and Behavior, 53(3), 472-480.	4
10	0	0	0		>0.05	0.597	19	31-90	2	Aves	Taeniopygia guttata			Captive	Male	Both	RESP	N	EIA	Kit	Plasma	N	ANOVA-ICC	Age= 16d-3mo; data provided by personal communication with H Wada	Wada, H., Salvante, K. G., Stables, C., Wagner, E., Williams, T. D., & Breuner, C. W. (2008). Adrenocortical responses in zebra finches (Taeniopygia guttata): individual variation, repeatability, and relationship to phenotypic quality. Hormones and Behavior, 53(3), 472-480.	4
10	0.061	0	0.489		>0.05	0.374	19	31-90	2	Aves	Taeniopygia guttata			Captive	Male	Both	INITIAL	N	EIA	Kit	Plasma	N	ANOVA-ICC	Age= 16d-3mo; data provided by personal communication with H Wada	Wada, H., Salvante, K. G., Stables, C., Wagner, E., Williams, T. D., & Breuner, C. W. (2008). Adrenocortical responses in zebra finches (Taeniopygia guttata): individual variation, repeatability, and relationship to phenotypic quality. Hormones and Behavior, 53(3), 472-480.	4
11	0.09				>0.05	0.12	11	8-14	>2	Aves	Passer domesticus	Within	Non-breeding	Wild-caught Captive	Both	Adult	INITIAL	Y	RIA	In-house	Plasma	Y	ANOVA-ICC	Experimenal short vs long days could have altered birds' perception of season; Adjusted for bleed time; Sample sizes differed by experimental treatment: short day (n= 13), long day (n=14), and molt (n=11); Long days, measured during the day while undergoing a prebasic molt	Romero, L. M., & Reed, J. M. (2008). Repeatability of baseline corticosterone concentrations. General and comparative endocrinology, 156(1), 27-33.	6
11	0.26				<0.05	<0.01	11	8-14	>2	Aves	Passer domesticus	Within	Non-breeding	Wild-caught Captive	Both	Adult	INITIAL	Y	RIA	In-house	Plasma	Y	ANOVA-ICC	Experimenal short vs long days could have altered birds' perception of season; Adjusted for bleed time; Sample sizes differed by experimental treatment: short day (n= 13), long day (n=14), and molt (n=11); Long days, measured during the night while undergoing a prebasic molt	Romero, L. M., & Reed, J. M. (2008). Repeatability of baseline corticosterone concentrations. General and comparative endocrinology, 156(1), 27-33.	6
11	0.23				<0.05	<0.012	13	8-14	>2	Aves	Passer domesticus	Within	Breeding	Wild-caught Captive	Both	Adult	INITIAL	Y	RIA	In-house	Plasma	Y	ANOVA-ICC	Experimenal short vs long days could have altered birds' perception of season; Adjusted for bleed time; Sample sizes differed by experimental treatment: short day (n= 13), long day (n=14), and molt (n=11); Short days, measured during the day	Romero, L. M., & Reed, J. M. (2008). Repeatability of baseline corticosterone concentrations. General and comparative endocrinology, 156(1), 27-33.	6
11	0.19				<0.05	<0.004	13	8-14	>2	Aves	Passer domesticus	Within	Breeding	Wild-caught Captive	Both	Adult	INITIAL	Y	RIA	In-house	Plasma	Y	ANOVA-ICC	Experimenal short vs long days could have altered birds' perception of season; Adjusted for bleed time; Sample sizes differed by experimental treatment: short day (n= 13), long day (n=14), and molt (n=11); Short days, measured during the night	Romero, L. M., & Reed, J. M. (2008). Repeatability of baseline corticosterone concentrations. General and comparative endocrinology, 156(1), 27-33.	6
11	-0.05				>0.05	0.57	14	8-14	>2	Aves	Passer domesticus	Within	Breeding	Wild-caught Captive	Both	Adult	INITIAL	Y	RIA	In-house	Plasma	Y	ANOVA-ICC	Experimenal short vs long days could have altered birds' perception of season; Adjusted for bleed time; Sample sizes differed by experimental treatment: short day (n= 13), long day (n=14), and molt (n=11); Long days, measured during the day	Romero, L. M., & Reed, J. M. (2008). Repeatability of baseline corticosterone concentrations. General and comparative endocrinology, 156(1), 27-33.	6
11	0.33				<0.05	<0.0001	14	8-14	>2	Aves	Passer domesticus	Within	Breeding	Wild-caught Captive	Both	Adult	INITIAL	Y	RIA	In-house	Plasma	Y	ANOVA-ICC	Experimenal short vs long days could have altered birds' perception of season; Adjusted for bleed time; Sample sizes differed by experimental treatment: short day (n= 13), long day (n=14), and molt (n=11); Long days, measured during the night	Romero, L. M., & Reed, J. M. (2008). Repeatability of baseline corticosterone concentrations. General and comparative endocrinology, 156(1), 27-33.	6
12	0.173				>0.05	0.255	15	91-195	2	Aves	Setophaga ruticilla	Within	Non-breeding	Wild	Both	Adult	INITIAL	N	RIA	In-house	Plasma	N	ANOVA-ICC		Angelier, F., Holberton, R. L., & Marra, P. P. (2009). Does stress response predict return rate in a migratory bird species? A study of American redstarts and their non-breeding habitat. Proceedings of the Royal Society of London B: Biological Sciences, 276(1672), 3545-3551.	2
12	0.634				<0.05	<0.001	24	91-195	2	Aves	Setophaga ruticilla	Within	Non-breeding	Wild	Both	Adult	RESP	N	RIA	In-house	Plasma	N	ANOVA-ICC		Angelier, F., Holberton, R. L., & Marra, P. P. (2009). Does stress response predict return rate in a migratory bird species? A study of American redstarts and their non-breeding habitat. Proceedings of the Royal Society of London B: Biological Sciences, 276(1672), 3545-3551.	2
13	0	0	0.4		>0.05	0.813	25	91-195	2	Aves	Parus major	Across		Wild	Both	Adult	RESP	N	EIA	Kit	Plasma	N	MixedModel-ICC		Ouyang, J. Q., Hau, M., & Bonier, F. (2011). Within seasons and among years: when are corticosterone levels repeatable?. Hormones and Behavior, 60(5), 559-564.	6
13	0	0	0.28		>0.05	0.889	50	31-90	2	Aves	Parus major	Across		Wild	Both	Adult	RESP	N	EIA	Kit	Plasma	N	MixedModel-ICC		Ouyang, J. Q., Hau, M., & Bonier, F. (2011). Within seasons and among years: when are corticosterone levels repeatable?. Hormones and Behavior, 60(5), 559-564.	6
13	0	0	0.37		>0.05	0.821	25	91-195	2	Aves	Parus major	Across		Wild	Both	Adult	INITIAL	N	EIA	Kit	Plasma	N	MixedModel-ICC		Ouyang, J. Q., Hau, M., & Bonier, F. (2011). Within seasons and among years: when are corticosterone levels repeatable?. Hormones and Behavior, 60(5), 559-564.	6
13	0.26	0.01	0.5		<0.05	0.025	50	31-90	2	Aves	Parus major	Across		Wild	Both	Adult	INITIAL	N	EIA	Kit	Plasma	N	MixedModel-ICC		Ouyang, J. Q., Hau, M., & Bonier, F. (2011). Within seasons and among years: when are corticosterone levels repeatable?. Hormones and Behavior, 60(5), 559-564.	6
13	0.08	0	0.32		>0.05	0.295	57	365+	2	Aves	Parus major	Within	Breeding	Wild	Both	Adult	RESP	N	EIA	Kit	Plasma	N	MixedModel-ICC		Ouyang, J. Q., Hau, M., & Bonier, F. (2011). Within seasons and among years: when are corticosterone levels repeatable?. Hormones and Behavior, 60(5), 559-564.	6
13	0.11	0	0.33		>0.05	0.191	57	365+	2	Aves	Parus major	Within	Breeding	Wild	Both	Adult	INITIAL	N	EIA	Kit	Plasma	N	MixedModel-ICC		Ouyang, J. Q., Hau, M., & Bonier, F. (2011). Within seasons and among years: when are corticosterone levels repeatable?. Hormones and Behavior, 60(5), 559-564.	6
14	0.05	0	0.36		>0.05	0.32	27	365+	2	Aves	Tachycineta bicolor	Within	Breeding	Wild	Female	Adult	INITIAL	N	RIA	In-house	Plasma	N	MixedModel-ICC		Ouyang, J. Q., Hau, M., & Bonier, F. (2011). Within seasons and among years: when are corticosterone levels repeatable?. Hormones and Behavior, 60(5), 559-564.	2
14	0.44	0.09	0.69		<0.05	0.004	27	31-90	2	Aves	Tachycineta bicolor	Within	Breeding	Wild	Female	Adult	INITIAL	N	RIA	In-house	Plasma	N	MixedModel-ICC		Ouyang, J. Q., Hau, M., & Bonier, F. (2011). Within seasons and among years: when are corticosterone levels repeatable?. Hormones and Behavior, 60(5), 559-564.	2
15	0.805				<0.05	<0.0001	20	8-14	>2	Amphibia	Platymantis vitiana	Within	Breeding	Wild	Female	Adult	RESP	N	EIA	In-house	Urine	N	ANOVA-ICC	RESP= corrected integrated GC response	Narayan, E. J., & Hero, J. M. (2013). Repeatability of baseline corticosterone and acute stress responses to capture, and patterns of reproductive hormones in vitellogenic and non_vitellogenic female Fijian ground frog (Platymantis vitiana). Journal of Experimental Zoology Part A: Ecological Genetics and Physiology, 319(8), 471-481.	2
15	0.853				<0.05	<0.0001	20	8-14	>2	Amphibia	Platymantis vitiana	Within	Breeding	Wild	Female	Adult	INITIAL	N	EIA	In-house	Urine	N	ANOVA-ICC	RESP= corrected integrated GC response	Narayan, E. J., & Hero, J. M. (2013). Repeatability of baseline corticosterone and acute stress responses to capture, and patterns of reproductive hormones in vitellogenic and non_vitellogenic female Fijian ground frog (Platymantis vitiana). Journal of Experimental Zoology Part A: Ecological Genetics and Physiology, 319(8), 471-481.	2
16	-0.005				>0.05	0.477	10	8-14	>2	Aves	Gallus gallus			Captive	Female	Adult	INITIAL	N	RIA	In-house	Plasma	Y	ANOVA-ICC	Measurements taken 1 time before and 3 times after mixing two groups of unfamiliar hens; R and p-values obtained from Cockrem et al. (2009) General and Comparative Endocrinology doi:10.1016/j.ygcen.2009.03.029	Littin, K. E., & Cockrem, J. F. (2001). Individual variation in corticosterone secretion in laying hens. British Poultry Science, 42(4), 536-546.	2
16	0.471				<0.05	0.001	10	8-14	>2	Aves	Gallus gallus			Captive	Female	Adult	RESP	N	RIA	In-house	Plasma	Y	ANOVA-ICC	Measurements taken 1 time before and 3 times after mixing two groups of unfamiliar hens; R and p-values obtained from Cockrem et al. (2009) General and Comparative Endocrinology doi:10.1016/j.ygcen.2009.03.029	Littin, K. E., & Cockrem, J. F. (2001). Individual variation in corticosterone secretion in laying hens. British Poultry Science, 42(4), 536-546.	2
17	0.262	0.07	0.46				66	365+	2	Aves	Sula granti	Within	Breeding	Wild	Both	Adult	RESP	Y	EIA	Kit	Serum	N	MixedModel-ICC	RESP= corrected integrated GC response; INITIAL Adjusted for year sampled, interactions between sex, breeding status, and mass; RESP Adjusted for interaction between sex and mass	Grace, J. K., & Anderson, D. J. (2014). Corticosterone stress response shows long-term repeatability and links to personality in free-living Nazca boobies. General and comparative endocrinology, 208, 39-48.	2
17	0.12	0	0.36				66	365+	2	Aves	Sula granti	Within	Breeding	Wild	Both	Adult	INITIAL	Y	EIA	Kit	Serum	N	MixedModel-ICC	RESP= corrected integrated GC response; INITIAL Adjusted for year sampled, interactions between sex, breeding status, and mass; RESP Adjusted for interaction between sex and mass	Grace, J. K., & Anderson, D. J. (2014). Corticosterone stress response shows long-term repeatability and links to personality in free-living Nazca boobies. General and comparative endocrinology, 208, 39-48.	2
18	0.1	0	0.41		>0.05	1	25	365+	>2	Aves	Aphelocoma coerulescens	Within	Pre-breeding	Wild	Female	Adult	INITIAL	N			Plasma	N	MixedModel-ICC	Non-significant p-value Bonferroni-corrected significance level at p < 0.008; 2004 and 2005 in-house RIA, 2010 and 2011 in-house RIA, 2012 kit EIA; RESP= corrected integrated GC response; Adjusted and Agreement repeatabilities calculated on same data, with same number of individuals; Used RIA and EIA, kit and in-house	Small, T. W., & Schoech, S. J. (2015). Sex differences in the long-term repeatability of the acute stress response in long-lived, free-living Florida scrub-jays (Aphelocoma coerulescens). Journal of Comparative Physiology B, 185(1), 119-133.	4
18	0.55	0.28	0.74		<0.05	<0.001	25	365+	>2	Aves	Aphelocoma coerulescens	Within	Pre-breeding	Wild	Female	Adult	RESP	N			Plasma	N	MixedModel-ICC	Non-significant p-value Bonferroni-corrected significance level at p < 0.008; 2004 and 2005 in-house RIA, 2010 and 2011 in-house RIA, 2012 kit EIA; RESP= corrected integrated GC response; Adjusted and Agreement repeatabilities calculated on same data, with same number of individuals; Used RIA and EIA, kit and in-house	Small, T. W., & Schoech, S. J. (2015). Sex differences in the long-term repeatability of the acute stress response in long-lived, free-living Florida scrub-jays (Aphelocoma coerulescens). Journal of Comparative Physiology B, 185(1), 119-133.	4
18	0.22	0	0.47		>0.05	0.0351*	32	365+	>2	Aves	Aphelocoma coerulescens	Within	Pre-breeding	Wild	Male	Adult	RESP	N			Plasma	N	MixedModel-ICC	Non-significant p-value Bonferroni-corrected significance level at p < 0.008; 2004 and 2005 in-house RIA, 2010 and 2011 in-house RIA, 2012 kit EIA; RESP= corrected integrated GC response; Adjusted and Agreement repeatabilities calculated on same data, with same number of individuals; Used RIA and EIA, kit and in-house	Small, T. W., & Schoech, S. J. (2015). Sex differences in the long-term repeatability of the acute stress response in long-lived, free-living Florida scrub-jays (Aphelocoma coerulescens). Journal of Comparative Physiology B, 185(1), 119-133.	4
18	0	0	0.21		>0.05	1	32	365+	>2	Aves	Aphelocoma coerulescens	Within	Pre-breeding	Wild	Male	Adult	INITIAL	N			Plasma	N	MixedModel-ICC	Non-significant p-value Bonferroni-corrected significance level at p < 0.008; 2004 and 2005 in-house RIA, 2010 and 2011 in-house RIA, 2012 kit EIA; RESP= corrected integrated GC response; Adjusted and Agreement repeatabilities calculated on same data, with same number of individuals; Used RIA and EIA, kit and in-house	Small, T. W., & Schoech, S. J. (2015). Sex differences in the long-term repeatability of the acute stress response in long-lived, free-living Florida scrub-jays (Aphelocoma coerulescens). Journal of Comparative Physiology B, 185(1), 119-133.	4
19	-0.004			0.194	>0.05	0.507	23	365+	2	Aves	Eudyptula minor	Within	Pre-breeding	Wild	Both	Adult	INITIAL	N	RIA	In-house	Plasma	N	ANOVA-ICC		Cockrem, J. F., Candy, E. J., Barrett, D. P., Agnew, P., & Potter, M. A. (2017). Individual variation and repeatability of corticosterone responses of little penguins (Eudyptula minor) sampled in two successive years at Oamaru, New Zealand. General and comparative endocrinology, 244, 86-92.	2
19	0.636			0.115	<0.05	<0.001	23	365+	2	Aves	Eudyptula minor	Within	Pre-breeding	Wild	Both	Adult	RESP	N	RIA	In-house	Plasma	N	ANOVA-ICC		Cockrem, J. F., Candy, E. J., Barrett, D. P., Agnew, P., & Potter, M. A. (2017). Individual variation and repeatability of corticosterone responses of little penguins (Eudyptula minor) sampled in two successive years at Oamaru, New Zealand. General and comparative endocrinology, 244, 86-92.	2
20	0.25	0	0.55				10	0-7	>2	Mammalia	Sus scrofa			Captive	Female	Adult	RESP	Y	EIA	Kit	Saliva	Y	MixedModel-ICC	Adjusted for test situation; RESP= integrated CORT response; Took saliva samples as 0, 10, and 35min post-test at 2 stressed and 2 control situations	Adcock, S. J., Martin, G. M., & Walsh, C. J. (2015). The stress response and exploratory behaviour in Yucatan minipigs (Sus scrofa): Relations to sex and social rank. Physiology & behavior, 152, 194-202.	2
20	0.3	0	0.57				10	0-7	>2	Mammalia	Sus scrofa			Captive	Male	Adult	RESP	Y	EIA	Kit	Saliva	Y	MixedModel-ICC	Adjusted for test situation; RESP= integrated CORT response; Took saliva samples as 0, 10, and 35min post-test at 2 stressed and 2 control situations	Adcock, S. J., Martin, G. M., & Walsh, C. J. (2015). The stress response and exploratory behaviour in Yucatan minipigs (Sus scrofa): Relations to sex and social rank. Physiology & behavior, 152, 194-202.	2
21	0.432				<0.05	<0.001	35	0-7	>2	Fish	Lepomis macrochirus	Within	Pre-breeding	Wild-caught Captive	Both	Adult	RESP	N	RIA	Kit	Plasma	N	ANOVA-ICC		Cook, K. V., O'Connor, C. M., McConnachie, S. H., Gilmour, K. M., & Cooke, S. J. (2012). Condition dependent intra-individual repeatability of stress-induced cortisol in a freshwater fish. Comparative Biochemistry and Physiology Part A: Molecular & Integrative Physiology, 161(3), 337-343.	1
22	0	0	0.35		>0.05	1	32	15-30	2	Aves	Hirundo rustica	Within	Breeding	Wild	Female	Adult	INITIAL	N	EIA	Kit	Plasma	Y	MixedModel-ICC	Includes data from experimenally increased, decreased, and control broods	Vitousek, M. N., Jenkins, B. R., Hubbard, J. K., Kaiser, S. A., & Safran, R. J. (2017). An experimental test of the effect of brood size on glucocorticoid responses, parental investment, and offspring phenotype. General and Comparative Endocrinology. IN PRESS	2
22	0.54	0.24	0.76		<0.05	0.004	32	15-30	2	Aves	Hirundo rustica	Within	Breeding	Wild	Female	Adult	RESP	N	EIA	Kit	Plasma	Y	MixedModel-ICC	Includes data from experimenally increased, decreased, and control broods	Vitousek, M. N., Jenkins, B. R., Hubbard, J. K., Kaiser, S. A., & Safran, R. J. (2017). An experimental test of the effect of brood size on glucocorticoid responses, parental investment, and offspring phenotype. General and Comparative Endocrinology. IN PRESS	2
23	0.78	0.56	0.9				44	365+	>2	Mammalia	Marmota marmota	Within	Breeding	Wild	Both	Both	RESP	Y	RIA	Kit	Plasma	N	MixedModel-ICC	RESP= interval between capture and the first blood sample (i.e., 17 +- 5 min) represented the reaction to the stress of capture and transportation; Adjusted for sex, age, body mass, time between capture and sample collection,	Ferrari, C., Pasquaretta, C., Carere, C., Cavallone, E., von Hardenberg, A., & R_ale, D. (2013). Testing for the presence of coping styles in a wild mammal. Animal Behaviour, 85(6), 1385-1396.	1
24	0.27				<0.05	0.045	41	31-90	2	Reptilia	Thamnophis elegans	Within	Breeding	Wild-caught Captive	Female	Adult	INITIAL	N	RIA	Kit	Plasma	N	ANOVA-ICC	Measurements taken 1 time in the field and 2 times in captivity; but repeatability estimate is on for measurements taken in captivity (pre- to post-parturition)	Sparkman, A. M., Bronikowski, A. M., Williams, S., Parsai, S., Manhart, W., & Palacios, M. G. (2014). Physiological indices of stress in wild and captive garter snakes: Correlations, repeatability, and ecological variation. Comparative Biochemistry and Physiology Part A: Molecular & Integrative Physiology, 174, 11-17.	1
25	0.74				<0.05	<0.001	20	8-14	>2	Amphibia	Rhinella marina	Within	Breeding	Wild	Male	Adult	RESP	N	EIA	In-house	Urine	N	ANOVA-ICC	RESP= corrected integrated GC response	Narayan, E. J., Cockrem, J. F., & Hero, J. M. (2013). Are baseline and short-term corticosterone stress responses in free-living amphibians repeatable?. Comparative Biochemistry and Physiology Part A: Molecular & Integrative Physiology, 164(1), 21-28.	2
25	0.877				<0.05	<0.0001	20	8-14	>2	Amphibia	Rhinella marina	Within	Breeding	Wild	Male	Adult	INITIAL	N	EIA	In-house	Urine	N	ANOVA-ICC	RESP= corrected integrated GC response	Narayan, E. J., Cockrem, J. F., & Hero, J. M. (2013). Are baseline and short-term corticosterone stress responses in free-living amphibians repeatable?. Comparative Biochemistry and Physiology Part A: Molecular & Integrative Physiology, 164(1), 21-28.	2
26	0.4						35	31-90	>2	Mammalia	Bos taurus			Captive	Female	Adult	RESP	Y	RIA	Kit	Saliva	Y	MixedModel-ICC	Adjusted for repetition, parity, interaction between parity and repetition; RESP= difference between basal AUC (at -20, 0, 80) and total AUC (all points) [Saliva was collected taken at t= -20, 0, 20, 40, 80 min relative to separation]; n= 35 individuals for first 3 repetitions but 15 for last repetition	M_ller, R., & Schrader, L. (2005). Behavioural consistency during social separation and personality in dairy cows. Behaviour, 142(9-10), 1289-1306.	1
27	0.5				<0.05	0.02	22	365+	2	Mammalia	Macaca mulatta	Within	Breeding	Wild	Female	Adult	RESP	Y	RIA	Kit	Plasma	N	Pearson	Adjusted for reproductive state; 14 of the 22 females switched reproductive state (cycling, pregnant, lactating) from one year to the next	Hoffman, C. L., Ayala, J. E., Mas_Rivera, A., & Maestripieri, D. (2010). Effects of reproductive condition and dominance rank on cortisol responsiveness to stress in free_ranging female rhesus macaques. American journal of Primatology, 72(7), 559-565.	1
28	0.57				<0.05	0.001	46	0-7	2	Mammalia	Urocitellus columbianus	Within	Non-breeding	Wild	Both	Both	INTEGRATED	N	EIA	In-house	Feces	N	Pearson	RESP= Individuals were trapped in traps for up to 1 hour before fecal samples were collected	Bosson, C. O., Palme, R., & Boonstra, R. (2009). Assessment of the stress response in Columbian ground squirrels: laboratory and field validation of an enzyme immunoassay for fecal cortisol metabolites. Physiological and Biochemical Zoology, 82(3), 291-301.	1
29	0.728				<0.05	0.014	20	8-14	>2	Amphibia	Rhinella marina	Within	Non-breeding	Wild-caught Captive	Male	Adult	RESP	N	EIA	In-house	Urine	N	ANOVA-ICC	RESP= corrected integrated GC response	Narayan, E. J., Molinia, F. C., Cockrem, J. F., & Hero, J. M. (2012). Individual variation and repeatability in urinary corticosterone metabolite responses to capture in the cane toad (Rhinella marina). General and comparative endocrinology, 175(2), 284-289.	2
29	0.63				<0.05	<0.001	20	8-14	>2	Amphibia	Rhinella marina	Within	Non-breeding	Wild-caught Captive	Male	Adult	INITIAL	N	EIA	In-house	Urine	N	ANOVA-ICC	RESP= corrected integrated GC response	Narayan, E. J., Molinia, F. C., Cockrem, J. F., & Hero, J. M. (2012). Individual variation and repeatability in urinary corticosterone metabolite responses to capture in the cane toad (Rhinella marina). General and comparative endocrinology, 175(2), 284-289.	2
30	0.05				>0.05	0.337	37	15-30	>2	Reptilia	Amblyrhynchus cristatus	Across		Wild	Female	Adult	RESP	N	RIA	In-house	Plasma	N	ANOVA-ICC		Vitousek, M. N., & Romero, L. M. (2013). Stress responsiveness predicts individual variation in mate selectivity. General and comparative endocrinology, 187, 32-38.	2
30	0.37				<0.05	0.037	16	8-14	>2	Reptilia	Amblyrhynchus cristatus	Within	Breeding	Wild	Female	Adult	RESP	N	RIA	In-house	Plasma	N	ANOVA-ICC		Vitousek, M. N., & Romero, L. M. (2013). Stress responsiveness predicts individual variation in mate selectivity. General and comparative endocrinology, 187, 32-38.	2
31	0.078			0.071			20	0-7	>2	Fish	Xiphophorus birchmanni			Captive	Male	Adult	INTEGRATED	Y	RIA	In-house	Water	Y	MixedModel-ICC	Adjusted for trial, day order, stack, and mass; INT= pre-trial water cort (before placed in an areana where a simulated predation attempt occurs)	Boulton, K., Couto, E., Grimmer, A. J., Earley, R. L., Canario, A. V., Wilson, A. J., & Walling, C. A. (2015). How integrated are behavioral and endocrine stress response traits? A repeated measures approach to testing the stress_coping style model._Ecology and evolution,_5(3), 618-633.	1
32	0.12	0	0.45				82	365+	2	Mammalia	Sturnus vulgaris	Across		Wild	Both	Adult	INTEGRATED	N	EIA	In-house	Feces	N	MixedModel-ICC		Dantzer, B., Santicchia, F., van Kesteren, F., Palme, R., Martinoli, A., & Wauters, L. A. (2016). Measurement of fecal glucocorticoid metabolite levels in Eurasian red squirrels (Sciurus vulgaris): effects of captivity, sex, reproductive condition, and season. Journal of Mammalogy, gyw095.	2
32	0.52	0.25	0.69				17	0-7	>2	Mammalia	Sturnus vulgaris	Within	Breeding	Wild-caught Captive	Both	Adult	INTEGRATED	N	EIA	In-house	Feces	N	MixedModel-ICC		Dantzer, B., Santicchia, F., van Kesteren, F., Palme, R., Martinoli, A., & Wauters, L. A. (2016). Measurement of fecal glucocorticoid metabolite levels in Eurasian red squirrels (Sciurus vulgaris): effects of captivity, sex, reproductive condition, and season. Journal of Mammalogy, gyw095.	2
33	0.27	0.11	0.43		<0.05	<0.01	108	365+	>2	Aves	Somateria mollissima	Within	Breeding	Wild	Female	Adult	INITIAL	N	RIA	Kit	Serum	N	MixedModel-ICC		Jaatinen, K., Seltmann, M. W., Hollm_n, T., Atkinson, S., Mashburn, K., & ãst, M. (2013). Context dependency of baseline glucocorticoids as indicators of individual quality in a capital breeder. General and comparative endocrinology, 191, 231-238.	1
34	0.332				<0.05	<0.001	28	0-7	>2	Aves	Chloephaga picta	Within	Breeding	Wild	Male	Adult	INTEGRATED	N	EIA	In-house	Feces	N		Information about statistical analysis provided by personal communication with A Gladbach	Gladbach, A., Gladbach, D. J., Koch, M., Kuchar, A., M_stl, E., & Quillfeldt, P. (2011). Can faecal glucocorticoid metabolites be used to monitor body condition in wild Upland geese Chloephaga picta leucoptera?. Behavioral ecology and sociobiology, 65(7), 1491-1498.	2
34	0.158				<0.05	0.005	29	0-7	>2	Aves	Chloephaga picta	Within	Breeding	Wild	Female	Adult	INTEGRATED	N	EIA	In-house	Feces	N		Information about statistical analysis provided by personal communication with A Gladbach	Gladbach, A., Gladbach, D. J., Koch, M., Kuchar, A., M_stl, E., & Quillfeldt, P. (2011). Can faecal glucocorticoid metabolites be used to monitor body condition in wild Upland geese Chloephaga picta leucoptera?. Behavioral ecology and sociobiology, 65(7), 1491-1498.	2
35	0.24	0	0.53		>0.05	0.1	33	8-14	2	Aves	Tachycineta bicolor	Within	Breeding	Wild	Female	Adult	INITIAL	N	EIA	Kit	Plasma	Y	MixedModel-ICC	Experimentally clipped every other primary flight feather; Consistency repeatability	Madliger, C. L., & Love, O. P. (2016). Employing individual measures of baseline glucocorticoids as population-level conservation biomarkers: considering within-individual variation in a breeding passerine. Conservation physiology, 4(1), cow048.	2
35	0.42	0.12	0.63		<0.05	0.006	40	8-14	2	Aves	Tachycineta bicolor	Within	Breeding	Wild	Female	Adult	INITIAL	N	EIA	Kit	Plasma	N	MixedModel-ICC		Madliger, C. L., & Love, O. P. (2016). Employing individual measures of baseline glucocorticoids as population-level conservation biomarkers: considering within-individual variation in a breeding passerine. Conservation physiology, 4(1), cow048.	2
36	0.12						352	365+	>2	Mammalia	Marmota flaviventris	Within	Breeding	Wild	Both	Both	INTEGRATED	Y	RIA	Kit	Feces	N	MixedModel-ICC	Adjusted for day of year, hour of trapping, age, sex; RESP= Individuals were trapped in traps for up to 2 hours before fecal samples were collected	Smith, J. E., Moncl_s, R., Wantuck, D., Florant, G. L., & Blumstein, D. T. (2012). Fecal glucocorticoid metabolites in wild yellow-bellied marmots: experimental validation, individual differences and ecological correlates. General and comparative endocrinology, 178(2), 417-426.	1
37	0.2			0.06	<0.05	<0.005	67	365+	>2	Mammalia	Cervus elaphus	Within	Breeding	Wild	Male	Adult	INTEGRATED	Y	EIA	In-house	Feces	N	MixedModel-ICC	Adjusted for a age at sampling, age at final sampling, month, date of assay	Pavitt, A. T., Walling, C. A., M_stl, E., Pemberton, J. M., & Kruuk, L. E. (2015). Cortisol but not testosterone is repeatable and varies with reproductive effort in wild red deer stags. General and comparative endocrinology, 222, 62-68.	1
38	0.282			0.209			9	15-30	>2	Aves	Taeniopygia guttata			Captive	Female	Adult	RESP	Y	EIA	Kit	Plasma	Y	MixedModel-ICC	Adjusted for treatment, body mass, and measurement set; Experimentally restricted parental diet during development (from clutch completion to 30days post hatch)	Careau, V., Buttemer, W. A., & Buchanan, K. L. (2014). Early-developmental stress, repeatability, and canalization in a suite of physiological and behavioral traits in female zebra finches. Integrative and comparative biology, 54(4), 539-554.	2
38	0.245			0.191			10	15-30	>2	Aves	Taeniopygia guttata			Captive	Female	Adult	RESP	Y	EIA	Kit	Plasma	N	MixedModel-ICC	Adjusted for treatment, body mass, and measurement set	Careau, V., Buttemer, W. A., & Buchanan, K. L. (2014). Early-developmental stress, repeatability, and canalization in a suite of physiological and behavioral traits in female zebra finches. Integrative and comparative biology, 54(4), 539-554.	2
39	0.47				<0.05	<0.0001	78	15-30	>2	Mammalia	Tamiasciurus hudsonicus	Across		Wild	Female	Adult	INTEGRATED	Y	EIA	In-house	Feces	N	MixedModel-ICC	Adjusted for days post-conception; Information on number of samples per individual and sampling interval provided by personal communication with B Dantzer	Dantzer, B., McAdam, A. G., Palme, R., Fletcher, Q. E., Boutin, S., Humphries, M. M., & Boonstra, R. (2010). Fecal cortisol metabolite levels in free-ranging North American red squirrels: assay validation and the effects of reproductive condition. General and comparative endocrinology, 167(2), 279-286.	1
40	0.973				<0.05	<0.0001	20	8-14	>2	Amphibia	Platymantis vitiana	Within	Breeding	Wild	Male	Adult	INITIAL	N	EIA	In-house	Urine	N	ANOVA-ICC	RESP= corrected integrated GC response	Narayan, E. J., Cockrem, J. F., & Hero, J. M. (2013). Repeatability of baseline corticosterone and short-term corticosterone stress responses, and their correlation with testosterone and body condition in a terrestrial breeding anuran (Platymantis vitiana). Comparative Biochemistry and Physiology Part A: Molecular & Integrative Physiology, 165(2), 304-312.	2
40	0.87				<0.05	<0.0001	20	8-14	>2	Amphibia	Platymantis vitiana	Within	Breeding	Wild	Male	Adult	RESP	N	EIA	In-house	Urine	N	ANOVA-ICC	RESP= corrected integrated GC response	Narayan, E. J., Cockrem, J. F., & Hero, J. M. (2013). Repeatability of baseline corticosterone and short-term corticosterone stress responses, and their correlation with testosterone and body condition in a terrestrial breeding anuran (Platymantis vitiana). Comparative Biochemistry and Physiology Part A: Molecular & Integrative Physiology, 165(2), 304-312.	2
41	0.389				<0.05	<0.001	64	15-30	>2	Fish	Dicentrarchus labrax			Captive	Both	Juvenile	RESP	N	EIA	Kit	Plasma	N	ANOVA-ICC		Samaras, A., Dimitroglou, A., Sarropoulou, E., Papaharisis, L., Kottaras, L., & Pavlidis, M. (2016). Repeatability of cortisol stress response in the European sea bass (Dicentrarchus labrax) and transcription differences between individuals with divergent responses._Scientific Reports,_6.	1
42	0.18	0	0.45		>0.05	0.096	45	15-30	2	Aves	Passer domesticus			Wild-caught Captive	Both	Adult	INTEGRATED	Y	RIA	In-house	Feathers	Y	MixedModel-ICC	Adjusted for Treatment; Feather CORT measured before and after sham, CORT, or metyrapone implant; Repeatabiliy calculated by K Schoenemann (data for calculation provided by personal communication with Y Aharon-Rotman)	Aharon-Rotman, Y., Buchanan, K. L., Klaassen, M., & Buttemer, W. A. (2015). An experimental examination of interindividual variation in feather corticosterone content in the House Sparrow, Passer domesticus in southeast Australia. General and comparative endocrinology.	1
43	0.184	0.066	0.3		<0.05	0.003	58	8-14	>2	Aves	Pygoscelis adeliae	Within	Breeding	Wild	Female	Adult	INITIAL	N	RIA	In-house	Plasma	N	MixedModel-ICC	Repeatability calculated by K Schoenemann; data for calculation provided by personal communication with C Vleck; Information about sampling interval provided by personal communication with C Vleck	unpublished data, Vleck; Methods from: Vleck, C. M., Bucher, T. L., Reed, W. L., & Kristmundsdottir, A. Y. (1999). Changes in reproductive hormones and body mass through the reproductive cycle in the Ad_lie penguin (Pygoscelis adeliae), with associated data on courting-only individuals. In Proceedings of the 22nd International Ornithological Congress (pp. 1210-1223). Durban: University of Natal.	2
43	0.077	0	0.17		<0.05	0.034	57	8-14	>2	Aves	Pygoscelis adeliae	Within	Breeding	Wild	Male	Adult	INITIAL	N	RIA	In-house	Plasma	N	MixedModel-ICC	Repeatability calculated by K Schoenemann; data for calculation provided by personal communication with C Vleck; Information about sampling interval provided by personal communication with C Vleck	unpublished data, Vleck; Methods from: Vleck, C. M., Bucher, T. L., Reed, W. L., & Kristmundsdottir, A. Y. (1999). Changes in reproductive hormones and body mass through the reproductive cycle in the Ad_lie penguin (Pygoscelis adeliae), with associated data on courting-only individuals. In Proceedings of the 22nd International Ornithological Congress (pp. 1210-1223). Durban: University of Natal.	2
44	0.074						199	365+	>2	Aves	Sterna hirundo	Within	Breeding	Wild	Both	Adult	INITIAL	N	RIA	In-house	Plasma	N	ANOVA-ICC		Riechert, J., Chastel, O., & Becker, P. H. (2012). Why do experienced birds reproduce better? Possible endocrine mechanisms in a long-lived seabird, the common tern. General and Comparative Endocrinology, 178(2), 391-399.	1
45	0.6159	0.2252	0.9218				10	0-7	2	Fish	Gasterosteus aculeatus	Within	Non-breeding	Wild-caught Captive	Both	Adult	INTEGRATED	N			Water	N	MixedModel-ICC	Steroid concentrations in water samples were analyzed via mass spectrometry; Cortisol release rates calculated as amount of cortisol released per gram of body weight per hour (ng/g/h)	Bensky, M. K., Paitz, R., Pereira, L., & Bell, A. M. (2017). Testing the predictions of coping styles theory in threespined sticklebacks. Behavioural processes, 136, 1-10.	1
46	0.08	0.02	0.32				27	31-90	2	Aves	Parus major	Within	Non-breeding	Wild-caught Captive	Both	Adult	INITIAL	N	EIA	Kit	Plasma	N	MixedModel-ICC	Individual identity and nest identity included as random terms in repeatability calculation	Baugh, A. T., Senft, R. A., Firke, M., Lauder, A., Schroeder, J., Meddle, S. L., ... & Hau, M. (2017). Risk-averse personalities have a systemically potentiated neuroendocrine stress axis: A multilevel experiment in Parus major. Hormones and Behavior, 93, 99-108.	2
46	0.12	0.3	0.43				27	31-90	2	Aves	Parus major	Within	Non-breeding	Wild-caught Captive	Both	Adult	RESP	N	EIA	Kit	Plasma	N	MixedModel-ICC	Individual identity and nest identity included as random terms in repeatability calculation	Baugh, A. T., Senft, R. A., Firke, M., Lauder, A., Schroeder, J., Meddle, S. L., ... & Hau, M. (2017). Risk-averse personalities have a systemically potentiated neuroendocrine stress axis: A multilevel experiment in Parus major. Hormones and Behavior, 93, 99-108.	2
47	0.34				<0.05	<0.001	20	0-7	>2	Fish	Gasterosteus aculeatus		Non-breeding	Wild-caught Captive	Female	Adult	INITIAL	N	EIA	In-house	Water	N	ANOVA-ICC		Fürtbauer, I., Pond, A., Heistermann, M., & King, A. J. (2015). Personality, plasticity and predation: linking endocrine and behavioural reaction norms in stickleback fish. Functional Ecology, 29(7), 931-940.	2
47	0.11				>0.05	0.087	20	0-7	>2	Fish	Gasterosteus aculeatus		Non-breeding	Wild-caught Captive	Female	Adult	RESP	N	EIA	In-house	Water	N	ANOVA-ICC	RESP= individuals were exposed to a predator model intended to stimulate a physiological response	Fürtbauer, I., Pond, A., Heistermann, M., & King, A. J. (2015). Personality, plasticity and predation: linking endocrine and behavioural reaction norms in stickleback fish. Functional Ecology, 29(7), 931-940.	2
48	0.284	0.028	0.516		<0.05	0.022	53	8-14	2	Aves	Poecile atricapillus	Within	Non-breeding	Wild	Both	Adult	INITIAL	N	EIA	Kit	Plasma	N	MixedModel-ICC		Schoenemann, K., Montreuil-Spencer, C., Bonier, F. 2017. Individual variation in glucocorticoid levels: a field study of repeatability. Master's Thesis. Queen's University; Kingston, Ontario.	1
